# Supplementary material for: Probiotic strain released-carbamoyl phosphates modify corticosterone metabolism on colonic epithelial cells by elevating 11-beta-hydroxysteroid dehydrogenase isozyme 2
Source: Research Square preprint supplement (doi:10.21203/rs.3.rs-7258444/v1), 2025-09-25
Supplement: Supplementary file 1 [file c7923a0d3da1f911fedbdd1e.docx]

**Figure S1. Characteristics of M3C-1B9 and CMT-93 cells.**

(A) Expression of β-catenin and UEA-1 in CMT-93 (left panels) and M3C-1B9 (right panels) cells. Arrows indicate UEA-1 signals.

(B) Expression of MUC2 (Red) in CMT-93 (left panel) and M3C-1B9 (right panel) cells.

(C) Relative gene expression of E-cadherin (*Cdh1*), *Claudin-1* (*Cldn1*), Claudin-2 (*Cldn2*), *Muc2*, *Tlr5*, *Nox1*, and *Defb1* in M3C-1B9 and CMT-93 cells measured by RT-PCR and normalized to *Gapdh*. Data are presented as mean ± SD; *n* = 3/group. **p* < 0.05 (vs. CMT-93).

**Figure S2. Dose-dependent effects of a carbamate on *Hsd11b2* expression.**

*Hsd11b2* expression following the addition of ten-fold serial dilutions of methyl N-(3-methoxyphenyl) carbamate to M3C-1B9 cells with corticosterone. *Gapdh* served as the internal reference. Data are presented as mean ± SD; *n* = 3/group. **p* < 0.05 (vs. without Carbamate).

**Figure S3. Effect of corticosterone and LcS on the gene expression of muscarinic acetylcholine receptors in M3C-1B9 cells.**

Relative gene expression of muscarinic acetylcholine receptors (*Chrm1, 2, 3, 4, 5*) following the addition of corticosterone to the lower medium layer of the cell culture insert. *Gapdh* served as the internal reference. Data are presented as mean ± SD; *n* = 3/group. **p* < 0.05 (vs. Corticosterone (-)).

**Figure S4. Effect of corticosterone and LcS on the gene expression and translocation of glucocorticoid receptor (GR) in M3C-1B9 cells.**

(A) Western blotting of GR and GAPDH extracted from the cytoplasm and nucleus of M3C-1B9 cells. Protein bands were imaged using LAS-3000 and quantified using ImageReader Software (Fujifilm). GR intensity was normalized to that of GAPDH.

(B) Relative GR (*Nr3c1*) expression normalized to *Gapdh*.

Data are presented as mean ± SD; *n* = 3/group; **p* < 0.05 (vs. Corticosterone (+) & LcS (-)).

**Figure S5. Effect of LcS on IκB subunit gene expression in M3C-1B9 cells.**

Relative *IκB* subunit (*Nfkbia, Nfkbib, Nfkbiz*) expression normalized to *Gapdh*. Data are presented as mean ± SD; *n* = 3/group; **p* < 0.05(vs. Corticosterone (+) & LcS (-)). Corticosterone (+) & LcS (-). Corticosterone added to the lower medium layer of the cell culture insert. Corticosterone (+) & LcS (+): corticosterone added to the lower medium layer and LcS added to the upper medium layer.
