# Supplementary material for: Probiotic strain released-carbamoyl phosphates modify corticosterone metabolism on colonic epithelial cells by elevating 11-beta-hydroxysteroid dehydrogenase isozyme 2
Source: Research Square preprint supplement (doi:10.21203/rs.3.rs-7258444/v1), 2025-09-25
Supplement: Supplementary file 2 [file d0435cbb8e3e6635e4f6f0ed.docx]

**Supplemental Material**

**Table S1. Metabolic candidates in LcS supernatant inducing *Hsd11b2* detected by LC-TOF/MS**

| **No*** | **Formula** | **Predicted name** | **MW** | **Intensity** | **No.** | **Formula** | **Predicted name** | **MW** | **Intensity** |
| --- | --- | --- | --- | --- | --- | --- | --- | --- | --- |
| (1) | C9H11NO3 | Methyl N-(3-methoxyphenyl) carbamate | 180.0666 | 679264 | (1) | C8H10O6 | Succinylacetoacetate | 202.0477 | 1310564 |
| (2) | C7H8O2 | 4-Ethenyl-5-methylfuran-2(5H)-one | 123.0452 | 489386 | (2) | C9H11NO3 | Methyl N-(3-methoxyphenyl) carbamate | 180.0666 | 981908 |
| (3) | C9H4N4 | 5-Aminobenzene-1,2,4-tricarbonitrile | 168.0436 | 175955 | (3) | C9H8O3 | m-Coumaric acid | 164.0473 | 586977 |
| (4) | C4H10ClNO | 2-[(2-Chloroethyl)amino]ethan-1-ol | 122.0378 | 134523 | (4) | C8H9NO | Benzenemethanamine, N-methylene-, N-oxide | 136.0757 | 358678 |
| (5) | C16H20Cl2N2OS | 1H-Imidazole-2-propanol, 5-((3,5-dichlorophenyl)thio)-1-methyl-4-(1-methylethyl)- | 357.0601 | 77108 | (5) | C8H11N3O2 | N-Ethyl-5-methyl-4-oxo-4lambda~5~-pyrazine-2-carboxamide | 182.0924 | 304817 |
| (6) | C23H17NO2S | (2-Methyl-2H-thiepino[4,5-c]pyrrole-5,7-diyl)bis(phenylmethanone) | 370.0907 | 56303 | (6) | C7H6O2 | But-2-yn-1-yl prop-2-ynoate | 123.0441 | 62139 |
| (7) | C10H14OS | 4-Methyl-5-(thiophen-3-yl)pentan-2-one | 182.0765 | 56147 | (7) | C15H15O2P | 3-(DIPHENYLPHOSPHINO)PROPIONIC ACID | 258.081 | 54760 |
| (8) | C9H8O3 | m-Coumaric acid | 164.0473 | 47594 | (8) | C4H7ClN4 | 3-Hydrazinylpyridazine--hydrogen chloride (1/1) | 147.0432 | 48934 |
| (9) | C5H7N3O | 1-(1H-1,2,4-Triazol-1-yl)propan-2-one | 124.0516 | 33251 | (9) | C8H9N | 2-Cyclopropylpyridine | 120.0808 | 41333 |
| (10) | C13H17N5O6S | 4-{[4,6-Bis(2-hydroxyethoxy)-1,3,5-triazin-2-yl]amino}benzene-1-sulfonamide | 370.0827 | 18477 | (10) | C4H12ClN5 | Metformin hydrochloride | 166.0854 | 37540 |
| (11) | C10H4N4 | NSC626149 | 180.0436 | 16983 | (11) | C15H17O4P | Isopropyl diphenyl phosphate | 292.0864 | 35142 |
| (12) | C15H13N7O4S | NSC114394 | 386.0677 | 15872 | (12) | C2H4N3P | 3-Methyl-3H-1,2,3,4-triazaphosphole | 119.0481 | 35000 |
| (13) | C4H8ClNO2 | Methyl (chloromethyl)methylcarbamate | 136.0171 | 15737 | (13) | C6H10F2O | 6,6-Difluorohex-5-en-1-ol | 137.0772 | 31544 |
| (14) | C17H14N2O4S2 | BENZO[3,4-D]1,3-DIOXOLEN-5-YL(3-PYRIDYLMETHYL)(2-THIENYLSULFONYL)AMINE | 373.0322 | 15682 | (14) | C15H17O4P | Isopropyl diphenyl phosphate | 292.0864 | 24593 |
| (15) | C16H12F6N2O | 2-(Trifluoromethyl)-N-{2-[5-(trifluoromethyl)pyridin-2-yl]ethyl}benzamide | 361.0781 | 15186 | (15) | C17H18Cl2N2S | N,N'-Bis[2-(4-chlorophenyl)ethyl]thiourea | 353.0641 | 23796 |
| (16) | C7H5F2N3 | 3-AMINO-6,7-DIFLUORO-1H-INDAZOLE | 168.0379 | 14286 | (16) | C5H8 | 1-Pentyne | 91.0518 | 23073 |
| (17) | C23H15ClN2O2 | N-(3-Chlorophenyl)-2-hydroxy-11H-benzo[a]carbazole-3-carboxamide | 385.0749 | 13672 | (17) | C8H6O3 | 7-Oxabicyclo[4.1.0]hepta-2,4-diene-1,6-dicarbaldehyde | 151.0390 | 21565 |
| (18) | C17H18N4O2S2 | NSC159718 | 373.0798 | 12698 | (18) | C15H15O2P | 3-(DIPHENYLPHOSPHINO)PROPIONIC ACID | 258.081 | 21236 |
| (19) | C20H19N5S | NSC266012 | 360.1288 | 11026 | (19) | C23H33N7O6 | Asn Trp Gly Lys | 504.2565 | 15928 |
| (20) | C7H6O3 | Peroxybenzoic acid | 137.0244 | 11001 | (20) | C11H12N6O4 | 4-amino-1-pentofuranosyl-1h-pyrazolo[3,4-d]pyrimidine-3-carbonitrile | 293.0993 | 15678 |

* The top 20 candidate compounds were listed in order of increasing intensity as detected in both negative- and positive-ion- mode measurements performed by LC-TOF/MS.
